# Supplementary material
Source: PubMed Central journal article supplement (PMC8892222)
Supplement: mmc1.pdf [file mmc1.pdf]

## Supplemental File

### Scoping Review of Telehealth for Musculoskeletal Disorders: Applications for the COVID-19 pandemic

Frank M Bucki, DC; Clay Michael, DC, MPH; Tobicznyk Hannah, DC;

Bart Green, DC, MEd, PhD

### *Journal of Manipulative and Physiological Therapeutics*

#### Search strategy

telerehabilitation AND musculoskeletal  
telemedicine AND chiropractic  
tele AND therapy AND efficacy  
tele AND ergonomics  
tele AND exercise  
telerehabilitation and cost  
telerehabilitation AND access  
telerehabilitation AND Patient Satisfaction  
telerehabilitation AND veteran  
tele AND rehabilitation

#### Study Flow Diagram

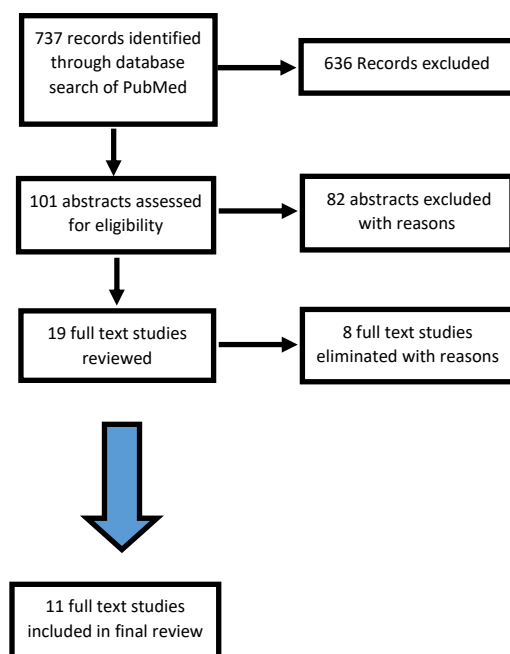

## Reasons for exclusion

| Study Name                                                                                                                                                                | Type of Study                       | Round 1 (I/E) | Round 2 (I/E) | Round 3 (I/E) | Round 4 (I/E) | Exclusion reasons/ comments | MESH Term Used                                                   |
|---------------------------------------------------------------------------------------------------------------------------------------------------------------------------|-------------------------------------|---------------|---------------|---------------|---------------|-----------------------------|------------------------------------------------------------------|
| Effectiveness of physiotherapy with telerehabilitation in surgical patients: a systematic review and meta-analysis.                                                       | Systematic review and Meta-analysis | Exclude       |               |               |               | Systematic Review           | Telerehabilitation and Patient Satisfaction Abstracts for Review |
| Use of a modified treatment-based classification system for subgrouping patients with low back pain: Agreement between telerehabilitation and face-to-face assessments.   | RCT                                 | Include       |               |               |               |                             | Telerehabilitation and Patient Satisfaction Abstracts for Review |
| The Role of Virtual Rehabilitation in Total and Unicompartmental Knee Arthroplasty.                                                                                       | Retrospective Review                | Exclude       |               |               |               | Not a comparative study     | Telerehabilitation and Patient Satisfaction Abstracts for Review |
| USEQ: A Short Questionnaire for Satisfaction Evaluation of Virtual Rehabilitation Systems.                                                                                | ??? Case study                      | Exclude       |               |               |               | Not a comparative study     | Telerehabilitation and Patient Satisfaction Abstracts for Review |
| Telerehabilitation of Patients with Injuries of the Lower Extremities.                                                                                                    | Clinical Trial                      | Exclude       |               |               |               | Not video-based             | Telerehabilitation and Patient Satisfaction Abstracts for Review |
| The cost-effectiveness of a web-based multimodal therapy for unilateral cerebral palsy: the Mitii randomized controlled trial.                                            | RCT                                 | Exclude       |               |               |               | Not musculoskeletal         | Telerehabilitation and Patient Satisfaction Abstracts for Review |
| Effectiveness of telerehabilitation programme following surgery in shoulder impingement syndrome (SIS): study protocol for a randomized controlled non-inferiority trial. | RCT                                 | Exclude       |               |               |               | Trial                       | Telerehabilitation and Patient Satisfaction Abstracts for Review |

|                                                                                                                                                                                                                         |                                          |         |  |  |  |                               |                                                                                                     |
|-------------------------------------------------------------------------------------------------------------------------------------------------------------------------------------------------------------------------|------------------------------------------|---------|--|--|--|-------------------------------|-----------------------------------------------------------------------------------------------------|
| Toward Patient-Centered Telerehabilitation Design: Understanding Chronic Pain Patients' Preferences for Web-Based Exercise Telerehabilitation Using a Discrete Choice Experiment.                                       | RCT                                      | Exclude |  |  |  | Not a comparative study       | Telerehabilitation and Patient Satisfaction Abstracts for Review                                    |
| The effectiveness and satisfaction of web-based physiotherapy in people with spinal cord injury: a pilot randomised controlled trial.                                                                                   | RCT                                      | Exclude |  |  |  | Not Musculoskeletal           | Telerehabilitation and Patient Satisfaction Abstracts for Review                                    |
| Is an in-home telerehabilitation program for people with proximal humerus fracture as effective as a conventional face-to face rehabilitation program? A study protocol for a noninferiority randomized clinical trial. | RCT                                      | Exclude |  |  |  | Trial                         | Telerehabilitation and Patient Satisfaction Abstracts for Review                                    |
| Patient Satisfaction with In-Home Telerehabilitation After Total Knee Arthroplasty: Results from a Randomized Controlled Trial.                                                                                         | RCT                                      | Include |  |  |  |                               | 1.Telerehabilitation and Patient Satisfaction Abstracts for Review<br>2.Telerehabilitation AND Cost |
| Home tele-rehabilitation for rheumatic patients: impact and satisfaction of care analysis.                                                                                                                              | RCT                                      | Exclude |  |  |  | Not musculoskeletal           | Telerehabilitation and Patient Satisfaction Abstracts for Review                                    |
| Clinical outcomes of remote asynchronous telerehabilitation are equivalent to traditional therapy following total knee arthroplasty: A randomized control study.                                                        | RCT                                      | Exclude |  |  |  | Not live – pre-recorded video | Telerehabilitation and Patient Satisfaction Abstracts for Review                                    |
| Effects of physical therapy delivery via home video telerehabilitation on functional and health-related quality of life outcomes.                                                                                       | Research Support, US Government, Non-PHS | Exclude |  |  |  | Not a comparative study       | Telerehabilitation and Patient Satisfaction Abstracts for Review                                    |

|                                                                                                                                                                                                                        |                                     |         |  |  |  |                         |                                                                                                         |
|------------------------------------------------------------------------------------------------------------------------------------------------------------------------------------------------------------------------|-------------------------------------|---------|--|--|--|-------------------------|---------------------------------------------------------------------------------------------------------|
| Web-based physiotherapy for people moderately affected with Multiple Sclerosis; quantitative and qualitative data from a randomized, controlled pilot study.                                                           | RC pilot study                      | Exclude |  |  |  | Not musculoskeletal     | Telerehabilitation and Patient Satisfaction Abstracts for Review                                        |
| The patient's perspective of in-home telerehabilitation physiotherapy services following total knee arthroplasty.                                                                                                      | Research Support, Non-US Gov't      | Exclude |  |  |  | Not a comparative study | Telerehabilitation and Patient Satisfaction Abstracts for Review                                        |
| Patients' satisfaction of healthcare services and perception with in-home telerehabilitation and physiotherapists' satisfaction toward technology for post-knee arthroplasty: an embedded study in a randomized trial. | Embedded study in randomized trial  | Include |  |  |  |                         | 1. Telerehabilitation and Patient Satisfaction Abstracts for Review<br>2. Telerehabilitation AND Access |
| An exploration of chronic pain patients' perceptions of home telerehabilitation services.                                                                                                                              | Research Support, Non-US Gov't      | Exclude |  |  |  | Not a comparative study | Telerehabilitation and Patient Satisfaction Abstracts for Review                                        |
| Patients' experiences of telerehabilitation at home after shoulder joint replacement.                                                                                                                                  | ??? Case study                      | Exclude |  |  |  | Not a comparative study | Telerehabilitation and Patient Satisfaction Abstracts for Review                                        |
| Feasibility study of home telerehabilitation for physically inactive veterans.                                                                                                                                         | Research Support, US Gov't, Non-PHS | Exclude |  |  |  | Not Video based         | Telerehabilitation and Patient Satisfaction Abstracts for Review                                        |
| Functional and clinical outcomes of telemedicine in patients with spinal cord injury.                                                                                                                                  | Multicenter Study, RCT              | Exclude |  |  |  | Not musculoskeletal     | Telerehabilitation and Patient Satisfaction Abstracts for Review                                        |
| A systematic review of clinical outcomes, clinical process, healthcare utilization and costs                                                                                                                           | Systematic Review                   | Exclude |  |  |  | Systematic Review       | Telerehabilitation and Patient Satisfaction Abstracts for Review                                        |

|                                                                                                                                                                                                                                    |                                                         |         |  |  |  |                         |                                                                  |
|------------------------------------------------------------------------------------------------------------------------------------------------------------------------------------------------------------------------------------|---------------------------------------------------------|---------|--|--|--|-------------------------|------------------------------------------------------------------|
| associated with telerehabilitation.                                                                                                                                                                                                |                                                         |         |  |  |  |                         |                                                                  |
| Telerehabilitation for veterans with a lower-limb amputation or ulcer: Technical acceptability of data.                                                                                                                            | Evaluation Studies, Research Support, US Gov't, Non-PHS | Exclude |  |  |  | Not musculoskeletal     | Telerehabilitation and Patient Satisfaction Abstracts for Review |
| Utilization of Interactive Clinical Video Telemedicine by Rural and Urban Veterans in the Veterans Health Administration Health Care System.                                                                                       | Observational Study                                     | Exclude |  |  |  | Not a comparative study | Miscellaneous                                                    |
| Factors influencing the adoption of telemedicine for treatment of military veterans with post-traumatic stress disorder.                                                                                                           | Review                                                  | Exclude |  |  |  | Not musculoskeletal     | Miscellaneous                                                    |
| Financial and Temporal Advantages of Virtual Consultation in Veterans Requiring Specialty Care.                                                                                                                                    | Cohort Study                                            | Exclude |  |  |  | Not a comparative study | Miscellaneous                                                    |
| Digital Support Interventions for the Self-Management of Low Back Pain: A Systematic Review.                                                                                                                                       | Systematic Review                                       | Exclude |  |  |  | Systematic Review       | Miscellaneous                                                    |
| First-contact care with a medical vs chiropractic provider after consultation with a swiss telemedicine provider: comparative of outcomes, patient satisfaction, and health care costs in spinal, hip, and shoulder pain patients. | Comparative Study, Research Support Non-US Gov't        | Exclude |  |  |  | Not video-based         | Miscellaneous                                                    |
| Tracking the evolution of virtual reality applications to rehabilitation as a field of study.                                                                                                                                      | Review                                                  | Exclude |  |  |  | Not a comparative study | Tele and therapy and efficacy                                    |
| A physical therapy programme for functional motor symptoms: A telemedicine pilot study.                                                                                                                                            | Pilot study                                             | Exclude |  |  |  | Not a comparative study | Tele and therapy and efficacy                                    |
| Evaluation of an innovative tele-education intervention in chronic pain management for primary care clinicians                                                                                                                     | Pre-post study                                          | Exclude |  |  |  | Not Musculoskeletal     | Tele and therapy and efficacy                                    |

|                                                                                                                                                                                                              |                                                        |         |  |  |  |                                   |                               |
|--------------------------------------------------------------------------------------------------------------------------------------------------------------------------------------------------------------|--------------------------------------------------------|---------|--|--|--|-----------------------------------|-------------------------------|
| practicing in underserved areas.                                                                                                                                                                             |                                                        |         |  |  |  |                                   |                               |
| Testing Tele-Savvy: Protocol for a randomized controlled trial.                                                                                                                                              | RCT                                                    | Exclude |  |  |  | Trial                             | Tele and therapy and efficacy |
| Efficacy of tele-rehabilitation compared with office-based physical therapy in patients with knee osteoarthritis: A randomized clinical trial.                                                               | RCT                                                    | Exclude |  |  |  | Not video-based                   | Tele and therapy and efficacy |
| Abstinence Reinforcement Therapy (ART) for rural veterans: Methodology for an mHealth smoking cessation intervention.                                                                                        | RCT                                                    | Exclude |  |  |  | Not musculoskeletal               | Tele and therapy and efficacy |
| Development and Implementation of Tele-Savvy for Dementia Caregivers: A Department of Veterans Affairs Clinical Demonstration Project.                                                                       | Multicenter Study, Research Support, US Gov't, Non-PHS | Exclude |  |  |  | Not musculoskeletal               | Tele and therapy and efficacy |
| [Rehabilitation using telemedicine].                                                                                                                                                                         | Review                                                 | Exclude |  |  |  | Not a comparative study           | Tele and therapy and efficacy |
| Group tele-exercise for improving balance in elders.                                                                                                                                                         | Evaluation Study                                       | Exclude |  |  |  | Not musculoskeletal               | Tele and therapy and efficacy |
| The effect of McKenzie therapy as compared with that of intensive strengthening training for the treatment of patients with subacute or chronic low back pain: A randomized controlled trial.                | RCT                                                    | Exclude |  |  |  | Does not address our question     | Tele and therapy and efficacy |
| Effect of tele-rehabilitation on glucose control, exercise capacity, physical fitness, muscle strength and psychosocial status in patients with type 2 diabetes: A double blind randomized controlled trial. | RCT                                                    | Exclude |  |  |  | Not musculoskeletal               | Tele and exercise             |
| Rationale and design of a Scale-Up Project Evaluating Responsiveness to Home Exercise And Lifestyle Tele-                                                                                                    | Trial                                                  | Exclude |  |  |  | Trial and not a comparative study | Tele and exercise             |

|                                                                                                                                                                                                                                                      |                                                         |         |  |  |  |                               |                   |
|------------------------------------------------------------------------------------------------------------------------------------------------------------------------------------------------------------------------------------------------------|---------------------------------------------------------|---------|--|--|--|-------------------------------|-------------------|
| Health (SUPER-HEALTH) in people with physical/mobility disabilities: a type 1 hybrid design effectiveness trial.                                                                                                                                     |                                                         |         |  |  |  |                               |                   |
| A home-based tele-rehabilitation protocol for patients with hip fracture called @ctivehip.                                                                                                                                                           | Clinical Trial, Research Support, Non-US Gov't          | Exclude |  |  |  | Does not address our question | Tele and exercise |
| Feasibility and Clinical Efficacy of a Multidisciplinary Home-Telehealth Program to Prevent Falls in Older Adults: A Randomized Controlled Trial.                                                                                                    | RCT                                                     | Exclude |  |  |  | Not musculoskeletal           | Tele and exercise |
| Combining the benefits of tele-rehabilitation and virtual reality-based balance training: a systematic review on feasibility and effectiveness.                                                                                                      | Systematic review                                       | Exclude |  |  |  | Systematic Review             | Tele and exercise |
| Rationale and design of the tele-exercise and multiple sclerosis (TEAMS) study: A comparative effectiveness trial between a clinic- and home-based telerehabilitation intervention for adults with multiple sclerosis (MS) living in the deep south. | Research Support, Non-US Gov't                          | Exclude |  |  |  | Not musculoskeletal           | Tele and exercise |
| TEAMS (Tele-Exercise and Multiple Sclerosis), a Tailored Telerehabilitation mHealth App: Participant-Centered Development and Usability Study.                                                                                                       | Usability Study                                         | Exclude |  |  |  | Not musculoskeletal           | Tele and exercise |
| Exploring physical activity behaviour - needs for and interest in a technology-delivered, home-based exercise programme among patients with intermittent claudication.                                                                               | Cross-Sectional Study                                   | Exclude |  |  |  | Not video-based               | Tele and exercise |
| The rehabilitation enhancing aging through connected health (REACH) study: study                                                                                                                                                                     | study protocol for a quasi-experimental clinical trial. | Exclude |  |  |  | Not musculoskeletal           | Tele and exercise |

|                                                                                                                                                                    |                                                            |         |  |  |  |                               |                   |
|--------------------------------------------------------------------------------------------------------------------------------------------------------------------|------------------------------------------------------------|---------|--|--|--|-------------------------------|-------------------|
| protocol for a quasi-experimental clinical trial.                                                                                                                  |                                                            |         |  |  |  |                               |                   |
| Development of a Multidisciplinary and Telemedicine Focused System Database.                                                                                       | ??? Case study (introducing software to group of patients) | Exclude |  |  |  | Does not address our question | Tele and exercise |
| Effects of home-based tele-exercise on sarcopenia among community-dwelling elderly adults: Body composition and functional fitness.                                | RCT                                                        | Exclude |  |  |  | Not musculoskeletal           | Tele and exercise |
| Consumer Perceptions of and Willingness to Use Remotely Delivered Service Models For Exercise Management of Knee and Hip Osteoarthritis: A Cross-Sectional Survey. | Cross-Sectional                                            | Exclude |  |  |  | Not a comparative study       | Tele and exercise |
| Web-based interventions in multiple sclerosis: the potential of tele-rehabilitation.                                                                               | Review                                                     | Exclude |  |  |  | Not musculoskeletal           | Tele and exercise |
| Motion trajectory analysis for evaluating the performance of functional upper extremity tasks in daily living: a pilot study.                                      | Pilot study                                                | Exclude |  |  |  | Does not address our question | Tele and exercise |
| Improving Preventive Healthcare with an User-centric Mobile Tele-monitoring Model.                                                                                 | Case study                                                 | Exclude |  |  |  | Not musculoskeletal           | Tele and exercise |
| Tele-Supervised FES-Assisted Exercise for Hemiplegic Upper Limb.                                                                                                   | RCT                                                        | Exclude |  |  |  | Not musculoskeletal           | Tele and exercise |
| Quality and Quantity of Rehabilitation Exercises Delivered By A 3-D Motion Controlled Camera: A Pilot Study.                                                       | Pilot study                                                | Exclude |  |  |  | Not a comparative study       | Tele and exercise |
| Design, construction and validation of a portable care system for the daily telerehabilitation of gait.                                                            | Validation Study                                           | Exclude |  |  |  | Does not address our question | Tele and exercise |



|                                                                                                                                                            |                                                 |                             |  |  |  |                         |                                                      |
|------------------------------------------------------------------------------------------------------------------------------------------------------------|-------------------------------------------------|-----------------------------|--|--|--|-------------------------|------------------------------------------------------|
| The Effect of Tele-Monitoring on Exercise Training Adherence, Functional Capacity, Quality of Life and Glycemic Control in Patients With Type II Diabetes. | Review                                          | Exclude                     |  |  |  | Not musculoskeletal     | Tele and exercise                                    |
| Comparison of telecommunication, community, and home-based Tai Chi exercise programs on compliance and effectiveness in elders at risk for falls.          | RCT                                             | Exclude                     |  |  |  | Not musculoskeletal     | Tele and exercise                                    |
| Trends in VA Telerehabilitation Patients and Encounters Over Time and by Rurality.                                                                         | ??? Review                                      | Exclude                     |  |  |  | Not a comparative study | Telerehabilitation AND Veterans Abstracts for review |
| The Effect of Telerehabilitation on Missed Appointment Rates.                                                                                              | RCT                                             | Exclude                     |  |  |  | Not musculoskeletal     | Telerehabilitation AND Veterans Abstracts for review |
| Department of Veterans Affairs Polytrauma Telerehabilitation: Twenty-First Century Care.                                                                   | Review                                          | Exclude                     |  |  |  | Not Musculoskeletal     | Telerehabilitation AND Veterans Abstracts for review |
| Web-based alcohol intervention for veterans: PTSD, combat exposure, and alcohol outcomes.                                                                  | RCT                                             | Exclude                     |  |  |  | Not Musculoskeletal     | Telerehabilitation AND Veterans Abstracts for review |
| Increasing Access to Cost Effective Home-Based Rehabilitation for Rural Veteran Stroke Survivors.                                                          | RCT                                             | Exclude                     |  |  |  | Not Musculoskeletal     | Telerehabilitation AND Veterans Abstracts for review |
| Benefits and Challenges of Delivering Tele-rehabilitation Services to Rural Veterans.                                                                      | ??? Case study                                  | Exclude, could extract data |  |  |  | Not a comparative study | Telerehabilitation AND Veterans Abstracts for review |
| Home Clinical Video Telehealth Promotes Education and Communication with Caregivers of Veterans with TBI.                                                  | Case Report, Research Support, US Gov't Non-PHS | Exclude                     |  |  |  | Not musculoskeletal     | Telerehabilitation AND Veterans Abstracts for review |
| Feasibility study of home telerehabilitation for physically inactive veterans.                                                                             | Research Support, US Gov't Non-PHS              | Exclude                     |  |  |  | Not video-based         | Telerehabilitation AND Veterans Abstracts for review |

|                                                                                                                                                         |                                                      |         |  |  |  |                               |                                                             |
|---------------------------------------------------------------------------------------------------------------------------------------------------------|------------------------------------------------------|---------|--|--|--|-------------------------------|-------------------------------------------------------------|
| Military and VA telemedicine systems for patients with traumatic brain injury.                                                                          | Research Support, US Gov't Non-PHS, Non-US Gov't     | Exclude |  |  |  | Not Musculoskeletal           | Telerehabilitation AND Veterans Abstracts for review        |
| Telerehabilitation for veterans with a lower-limb amputation or ulcer: Technical acceptability of data.                                                 | Evaluation Study, Research Support, US Gov't Non-PHS | Exclude |  |  |  | Not Musculoskeletal           | Telerehabilitation AND Veterans Abstracts for review        |
| Telehealth and ergonomics: a pilot study.                                                                                                               | Pilot Study                                          | Exclude |  |  |  | Pilot study                   | Tele and ergonomics                                         |
| Measurement of physical quantities in upper-limb tele-rehabilitation.                                                                                   | Evaluation Study                                     | Exclude |  |  |  | Not Musculoskeletal           | Tele and ergonomics                                         |
| Apps and Mobile Health Technology in Rehabilitation: The Good, the Bad, and the Unknown.                                                                | Review                                               | Exclude |  |  |  | Not video-based               | Telerehabilitation AND Musculoskeletal abstracts for review |
| Clinicians' Perspectives of a Novel Home-Based Multidisciplinary Telehealth Service for Patients with Chronic Spinal Pain.                              | Crossover study                                      | Exclude |  |  |  | Does not address our question | Telerehabilitation AND Musculoskeletal abstracts for review |
| Telehealth Physical Therapy in Musculoskeletal Practice.                                                                                                | Review                                               | Exclude |  |  |  | Not a comparative study       | Telerehabilitation AND Musculoskeletal abstracts for review |
| Case Studies in Physical Therapy: Transitioning A "Hands-On" Approach into A Virtual Platform.                                                          | Case Report                                          | Exclude |  |  |  | Not a comparative study       | Telerehabilitation AND Musculoskeletal abstracts for review |
| Follow-up monitoring of physical activity after rehabilitation by means of a mobile application: Effectiveness of measurements in different age groups. | Clinical Trial                                       | Exclude |  |  |  | Not video-based               | Telerehabilitation AND Musculoskeletal abstracts for review |
| The Role of Virtual Rehabilitation in Total Knee and Hip Arthroplasty.                                                                                  | Research Support, Non-US Gov't                       | Exclude |  |  |  | Not live video based          | Telerehabilitation AND Musculoskeletal abstracts for review |

|                                                                                                                                                                                                     |                   |         |         |  |  |                                                                                          |                                                                                                                                      |
|-----------------------------------------------------------------------------------------------------------------------------------------------------------------------------------------------------|-------------------|---------|---------|--|--|------------------------------------------------------------------------------------------|--------------------------------------------------------------------------------------------------------------------------------------|
| Telehealth applications for outpatients with neuromuscular or musculoskeletal disorders.                                                                                                            | Review            | Exclude |         |  |  | Not a comparative study                                                                  | Telerehabilitation AND Musculoskeletal abstracts for review                                                                          |
| Service provider perceptions of telerehabilitation as an additional service delivery option within an Australian neurosurgical and orthopaedic physiotherapy screening clinic: A qualitative study. | Multicenter Study | Exclude |         |  |  | Does not address our question                                                            | Telerehabilitation AND Musculoskeletal abstracts for review                                                                          |
| Randomized Controlled Trial of Adding Telephone Follow-Up to an Occupational Rehabilitation Program to Increase Work Participation.                                                                 | RCT               | Exclude |         |  |  | Not video-based                                                                          | Telerehabilitation AND Musculoskeletal abstracts for review                                                                          |
| Evidence of Benefit of Telerehabilitation After Orthopedic Surgery: A Systematic Review.                                                                                                            | Systematic Review | Exclude |         |  |  | Systematic Review                                                                        | Telerehabilitation AND Musculoskeletal abstracts for review                                                                          |
| Telerehabilitation after arthroscopic subacromial decompression is effective and not inferior to standard practice: Preliminary results.                                                            | RCT               | Include | Exclude |  |  | Telerehabilitation intervention was not live and included TR system of recording and app | 1. Telerehabilitation AND Musculoskeletal abstracts for review<br>2. Telerehabilitation AND Access<br>3. Telerehabilitation AND Cost |
| Use of videoconferencing for physical therapy in people with musculoskeletal conditions: A systematic review.                                                                                       | Systematic Review | Exclude |         |  |  | Systematic Review                                                                        | Telerehabilitation AND Musculoskeletal abstracts for review                                                                          |
| Real-time telerehabilitation for the treatment of musculoskeletal conditions is effective and comparable to standard practice: a systematic review and meta-analysis.                               | Systematic Review | Exclude |         |  |  | Systematic review                                                                        | Telerehabilitation AND Musculoskeletal abstracts for review                                                                          |

|                                                                                                                                                                                                                   |                       |         |  |  |  |                     |                                                                                                    |
|-------------------------------------------------------------------------------------------------------------------------------------------------------------------------------------------------------------------|-----------------------|---------|--|--|--|---------------------|----------------------------------------------------------------------------------------------------|
| Validity and reliability of Internet-based physiotherapy assessment for musculoskeletal disorders: a systematic review.                                                                                           | Systematic Review     | Exclude |  |  |  | Systematic review   | Telerehabilitation AND Musculoskeletal abstracts for review                                        |
| Physiotherapy assessment and diagnosis of musculoskeletal disorders of the knee via telerehabilitation.                                                                                                           | Cross-over study; RCT | Include |  |  |  |                     | Telerehabilitation AND Musculoskeletal abstracts for review                                        |
| Effects of Adding an Internet-Based Pain Coping Skills Training Protocol to a Standardized Education and Exercise Program for People With Persistent Hip Pain (HOPE Trial): Randomized Controlled Trial Protocol. | RCT                   | Exclude |  |  |  | not video based     | Telerehabilitation AND Musculoskeletal abstracts for review                                        |
| Efficacy of a telerehabilitation intervention programmed using biofeedback among computer operators.                                                                                                              | Case study            |         |  |  |  | Not Musculoskeletal | Telerehabilitation AND Musculoskeletal abstracts for review                                        |
| The validity of physical therapy assessment of low back pain via telerehabilitation in a clinical setting.                                                                                                        | RCT, Validation Study | Include |  |  |  |                     | 1. Telerehabilitation AND Musculoskeletal abstracts for review<br>2. Telerehabilitation AND Access |
| Agreement between telerehabilitation and face-to-face clinical outcome assessments for low back pain in primary care.                                                                                             | RCT                   | Exclude |  |  |  | Pilot study         | Telerehabilitation AND Musculoskeletal abstracts for review                                        |
| Assessment and Diagnosis of Musculoskeletal Shoulder Disorders over the Internet.                                                                                                                                 | RCT                   | Include |  |  |  |                     | Telerehabilitation AND Musculoskeletal abstracts for review                                        |
| Validity and reliability of the assessment and diagnosis of musculoskeletal elbow disorders using telerehabilitation.                                                                                             | RCT, Validation Study | Include |  |  |  |                     | Telerehabilitation AND Musculoskeletal abstracts for review                                        |

|                                                                                                                                                                                                                                    |                          |                  |  |  |  |                                                                                      |                                                                                                  |
|------------------------------------------------------------------------------------------------------------------------------------------------------------------------------------------------------------------------------------|--------------------------|------------------|--|--|--|--------------------------------------------------------------------------------------|--------------------------------------------------------------------------------------------------|
| Telerehabilitation mediated physiotherapy assessment of ankle disorders.                                                                                                                                                           | RCT, Validation Study    | Include          |  |  |  |                                                                                      | Telerehabilitation AND Musculoskeletal abstracts for review                                      |
| The diagnostic accuracy of telerehabilitation for non-articular lower-limb musculoskeletal disorders.                                                                                                                              | RCT, Validation Study    | Include          |  |  |  |                                                                                      | 1.Telerehabilitation AND Musculoskeletal abstracts for review<br>2.Telerehabilitation AND Access |
| Virtual rehabilitation-- benefits and challenges.                                                                                                                                                                                  | Review; Research Support | Exclude          |  |  |  | Not a comparative study                                                              | Telerehabilitation AND Musculoskeletal abstracts for review                                      |
| A home-based tele-rehabilitation protocol for patients with hip fracture called @ctivehip                                                                                                                                          |                          | Already Excluded |  |  |  | duplicate                                                                            | Telerehabilitation AND Access                                                                    |
| Effectiveness of an interactive telerehabilitation system with home-based exercise training in patients after total hip or knee replacement: study protocol for a multicenter, superiority, no-blinded randomized controlled trial | RCT                      | Exclude          |  |  |  | Not complete study protocol                                                          | Telerehabilitation AND Access                                                                    |
| Cost analysis of telerehabilitation after arthroscopic subacromial decompression.                                                                                                                                                  | RCT                      | Exclude          |  |  |  | Study used TR program that included app software and not just video based one on one | 1.Telerehabilitation AND Access<br>2.Telerehabilitation AND Cost                                 |
| Telerehabilitation of Patients with Injuries of the Lower Extremities                                                                                                                                                              | Trial                    | Already Excluded |  |  |  | duplicate                                                                            | Telerehabilitation AND Access                                                                    |

|                                                                                                                                                                                   |     |                  |  |  |  |                                                                 |                                                                             |
|-----------------------------------------------------------------------------------------------------------------------------------------------------------------------------------|-----|------------------|--|--|--|-----------------------------------------------------------------|-----------------------------------------------------------------------------|
| Telerehabilitation after arthroscopic subacromial decompression is effective and not inferior to standard practice: Preliminary results                                           | RCT | Already Included |  |  |  | duplicate                                                       | Telerehabilitation AND Access                                               |
| Patient Satisfaction with In-Home Telerehabilitation After Total Knee Arthroplasty: Results from a Randomized Controlled Trial.                                                   | RCT | Already Included |  |  |  | duplicate                                                       | Telerehabilitation AND Access                                               |
| Conditions of Use, Reliability, and Quality of Audio/Video-Mediated Communications During In-Home Rehabilitation Teletreatment for Postknee Arthroplasty                          | RCT | Exclude          |  |  |  | Did not compare with face to face in MSK setting                | Telerehabilitation AND Access                                               |
| The validity of physical therapy assessment of low back pain via telerehabilitation in a clinical setting                                                                         | RCT | Already Included |  |  |  | duplicate                                                       | Telerehabilitation AND Access                                               |
| A randomized controlled trial of home telerehabilitation for post-knee arthroplasty                                                                                               | RCT | Include          |  |  |  |                                                                 | Telerehabilitation AND Access but actually measured outcomes and not access |
| Internet-based outpatient telerehabilitation for patients following total knee arthroplasty: a randomized controlled trial.                                                       | RCT | Include          |  |  |  |                                                                 | Telerehabilitation AND Access but actually measured outcomes and not access |
| The diagnostic accuracy of telerehabilitation for nonarticular lower-limb musculoskeletal disorders.                                                                              | RCT | Already Included |  |  |  | Duplicate                                                       | Telerehabilitation AND Access                                               |
| Cost-effectiveness of a blended physiotherapy intervention compared to usual physiotherapy in patients with hip and/or knee osteoarthritis: a cluster randomized controlled trial | RCT | Exclude          |  |  |  | Study blended Video and Face to Face and not direct comparison. | Telerehabilitation AND Cost                                                 |
| Cost analysis of telerehabilitation after                                                                                                                                         | RCT | Already Excluded |  |  |  | Duplicate                                                       | Telerehabilitation AND Cost                                                 |

|                                                                                                                                                                                                                  |     |                  |  |  |  |                                                    |                             |
|------------------------------------------------------------------------------------------------------------------------------------------------------------------------------------------------------------------|-----|------------------|--|--|--|----------------------------------------------------|-----------------------------|
| arthroscopic subacromial decompression                                                                                                                                                                           |     |                  |  |  |  |                                                    |                             |
| Efficacy of tele-rehabilitation compared with office-based physical therapy in patients with knee osteoarthritis: A randomized clinical trial                                                                    | RCT | Already Excluded |  |  |  | Duplicate                                          | Telerehabilitation AND Cost |
| Telerehabilitation after arthroscopic subacromial decompression is effective and not inferior to standard practice: Preliminary results.                                                                         | RCT | Already Included |  |  |  | Duplicate                                          | Telerehabilitation AND Cost |
| Effectiveness of telerehabilitation programme following surgery in shoulder impingement syndrome (SIS): study protocol for a randomized controlled non-inferiority trial                                         | RCT | Already Excluded |  |  |  | Duplicate                                          | Telerehabilitation AND Cost |
| Patient Satisfaction with In-Home Telerehabilitation After Total Knee Arthroplasty: Results from a Randomized Controlled Trial                                                                                   | RCT | Already Included |  |  |  | Duplicate                                          | Telerehabilitation AND Cost |
| Effects of Adding an Internet-Based Pain Coping Skills Training Protocol to a Standardized Education and Exercise Program for People With Persistent Hip Pain (HOPE Trial): Randomized Controlled Trial Protocol | RCT | Already Excluded |  |  |  | Duplicate                                          | Telerehabilitation AND Cost |
| Cost analysis of in-home telerehabilitation for post-knee arthroplasty                                                                                                                                           | RCT | Exclude          |  |  |  | Did not compare Video to MSK setting face to face. | Telerehabilitation AND Cost |
